# Supplementary material
Source: PubMed Central journal article supplement (PMC1599966)

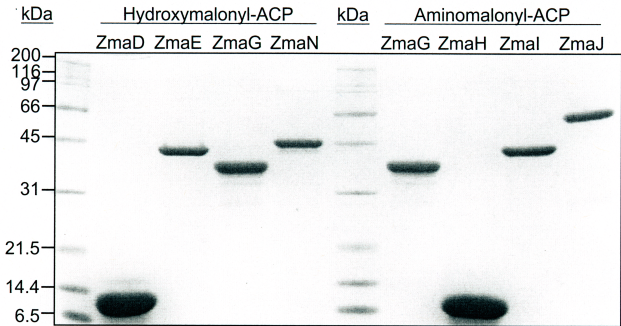

Supplement: pnas_0603748103_1.pdf [file pnas_0603748103_1.pdf]

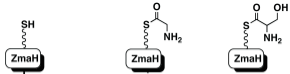

A. AM-ZmaH (5 min)

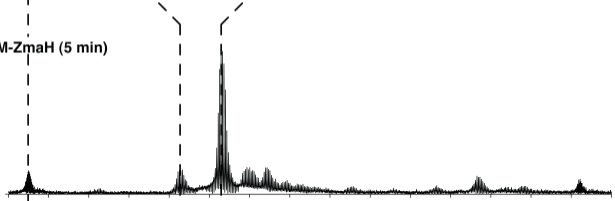

B. AM-ZmaH (40 min)

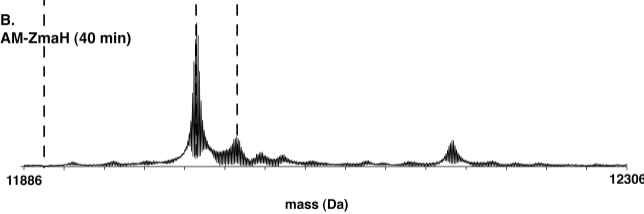

Supplement: pnas_0603748103_2.pdf [file pnas_0603748103_2.pdf]
